# Supplementary material for: Modelling the Effect of Compliance with Nordic Nutrition Recommendations on Cardiovascular Disease and Cancer Mortality in the Nordic Countries
Source: PubMed Central journal article supplement (PMC6627195; doi:10.3390/nu11061434), 2019-06-25
Supplement: nutrients-11-01434-s001.pdf [file nutrients-11-01434-s001.pdf]

**Annex 1. Country-specific age-group and sex-specific mean (standard deviation) dietary intake incorporated in the PRIME model**

**Table 1.** Age-group and sex-specific mean (standard deviation) dietary intake of Swedish population incorporated in the PRIME model \*.

| Dietary components   | Men (n=792)               |             |             |             | Women (n=1005) |             |             |             |             |
|----------------------|---------------------------|-------------|-------------|-------------|----------------|-------------|-------------|-------------|-------------|
|                      | Age-group and sample size | 18-30 (132) | 31-44 (183) | 45-64 (308) | 65-80 (169)    | 18-30 (202) | 31-44 (247) | 45-64 (358) | 65-80 (198) |
| Energy (kcal/day)    |                           | 2246 (830)  | 2343 (573)  | 2254 (674)  | 2083 (550)     | 1819 (538)  | 1820 (517)  | 1755 (510)  | 1703 (432)  |
| Vegetables (gm/day)  |                           | 142 (98)    | 174 (89)    | 176 (114)   | 169 (100)      | 162 (96)    | 189 (95)    | 192 (104)   | 178 (90)    |
| Fruits (gm/day)      |                           | 67 (88)     | 73 (87)     | 117 (124)   | 149 (110)      | 112 (95)    | 135 (104)   | 155 (111)   | 182 (107)   |
| Fibre (gm/day)       |                           | 18.6 (8.5)  | 21.3 (7.9)  | 21.8 (8.0)  | 22.5 (7.6)     | 17.3 (6.5)  | 18.5 (7.3)  | 19.3 (7.0)  | 20.0 (6.5)  |
| Salt (gm/day)        |                           | 9.12 (3.47) | 9.55 (2.56) | 9.09 (2.91) | 8.03 (2.16)    | 6.92 (2.06) | 7.19 (2.18) | 6.89 (1.93) | 6.36 (1.85) |
| Fat (%E)             |                           | 33.9 (6.7)  | 34.6 (6.4)  | 33.8 (6.5)  | 33.6 (6.3)     | 34.6 (5.7)  | 34.7 (5.6)  | 34.7 (7.3)  | 33.2 (5.5)  |
| Saturated fat (%E)   |                           | 13.2 (3.4)  | 13.2 (3.2)  | 13.0 (3.2)  | 12.8 (3.2)     | 13.1 (2.8)  | 13.3 (3.1)  | 13.2 (3.7)  | 12.8 (2.9)  |
| MUFA (%E)            |                           | 12.8 (2.8)  | 13.1 (2.8)  | 12.7 (2.8)  | 12.5 (2.5)     | 13.1 (2.7)  | 13.0 (2.5)  | 12.9 (3.1)  | 12.3 (2.5)  |
| PUFA (%E)            |                           | 5.2 (1.9)   | 5.6 (2.0)   | 5.4 (1.8)   | 5.6 (2.2)      | 5.8 (2.1)   | 5.6 (1.9)   | 5.8 (2.0)   | 5.5 (1.7)   |
| Cholesterol (mg/day) |                           | 314 (172)   | 319 (139)   | 322 (141)   | 321 (138)      | 245 (121)   | 257 (113)   | 274 (129)   | 269 (123)   |

\* Obtained from Riksmaten 2010–2011 Swedish Adults Dietary Survey.

**Table 2.** Age-group and sex-specific mean (standard deviation) dietary intake of Danish population incorporated in the PRIME model\*.

| Dietary components  | Men (n=1494)              |             |             |             |             |             | Women (n=1552) |             |             |             |             |             |             |
|---------------------|---------------------------|-------------|-------------|-------------|-------------|-------------|----------------|-------------|-------------|-------------|-------------|-------------|-------------|
|                     | Age-group and sample size | 18-24 (170) | 25-34 (190) | 35-44 (253) | 45-54 (297) | 55-64 (292) | 65-75 (292)    | 18-24 (176) | 25-34 (185) | 35-44 (289) | 45-54 (318) | 55-64 (322) | 65-75 (262) |
| Energy (kcal/day)   |                           | 2557 (815)  | 2772 (882)  | 2725 (686)  | 2725 (793)  | 2629 (719)  | 2581 (736)     | 1936 (600)  | 2103 (691)  | 2103 (528)  | 2032 (502)  | 1984 (502)  | 1984 (535)  |
| Vegetables (gm/day) |                           | 171 (98)    | 210 (116)   | 204 (151)   | 191 (101)   | 186 (109)   | 180 (142)      | 179 (94)    | 211 (105)   | 217 (123)   | 216 (119)   | 210 (116)   | 194 (116)   |
| Fruits (gm/day)     |                           | 131 (126)   | 147 (135)   | 139 (127)   | 176 (163)   | 184 (154)   | 197 (162)      | 188 (135)   | 183 (135)   | 197 (143)   | 214 (138)   | 220 (133)   | 250 (162)   |
| Fibre (gm/day)      |                           | 22 (9.4)    | 23 (8.5)    | 24 (8.8)    | 25 (8.2)    | 25 (8.4)    | 24 (9.1)       | 19 (7.2)    | 21 (7)      | 21 (6.6)    | 21 (6.6)    | 22 (6.3)    | 21 (7)      |

|                         |           |                |                 |                 |                 |          |               |           |           |           |           |           |
|-------------------------|-----------|----------------|-----------------|-----------------|-----------------|----------|---------------|-----------|-----------|-----------|-----------|-----------|
| Salt (gm/day)           | 11 (3.7)  | 11.5<br>(3.35) | 11.25<br>(2.98) | 11.25<br>(3.28) | 10.75<br>(3.18) | 10 (3)   | 7.75<br>(2.5) | 8.5 (2.7) | 8.5 (2.2) | 8 (2.3)   | 8 (2.2)   | 7.5 (2.2) |
| Fat (%E)                | 36 (6.1)  | 36 (4.9)       | 36 (4.9)        | 37 (5.5)        | 37 (5.6)        | 36 (5.5) | 35 (5.3)      | 36 (4.6)  | 36 (4.9)  | 36 (5.4)  | 36 (5.6)  | 36 (5.5)  |
| Saturated fat (%E)      | 14 (3)    | 14 (2.6)       | 14 (2.5)        | 15 (2.7)        | 15 (3.1)        | 15 (3.1) | 13 (2.6)      | 14 (2.4)  | 14 (2.5)  | 14 (2.8)  | 14 (2.9)  | 14 (3.1)  |
| MUFA (%E)               | 14 (2.9)  | 14 (2.2)       | 14 (2.3)        | 14 (2.5)        | 13 (2.4)        | 13 (2.3) | 13 (2.5)      | 14 (2.1)  | 13 (2.3)  | 13 (2.6)  | 13 (2.5)  | 13 (2.3)  |
| PUFA (%E)               | 5.6 (1.3) | 5.5 (0.9)      | 5.5 (0.9)       | 5.5 (1)         | 5.5 (1)         | 5.5 (1)  | 5.5 (1.1)     | 5.7 (1.)  | 5.7 (1)   | 5.7 (1.2) | 5.7 (1.2) | 5.6 (1.0) |
| Cholesterol<br>(mg/day) | NA        | NA             | NA              | NA              | NA              | NA       | NA            | NA        | NA        | NA        | NA        | NA        |

NA, Not Available \* Obtained from Danish National Survey of Diet and Physical Activity (DANSDA) 2011–2013

**Table 3.** Age-group and sex-specific mean (standard deviation) dietary intake of Norwegian population incorporated in the PRIME model\* .

| Dietary components        | Men (n=862) |             |             |             |             | Women (n=925) |             |             |             |             |
|---------------------------|-------------|-------------|-------------|-------------|-------------|---------------|-------------|-------------|-------------|-------------|
|                           | 18-29 (138) | 30-39 (136) | 40-49 (179) | 50-59 (192) | 60-70 (217) | 18-29 (143)   | 30-39 (169) | 40-49 (256) | 50-59 (193) | 60-70 (164) |
| Age-group and sample size |             |             |             |             |             |               |             |             |             |             |
| Energy (kcal/day)         | 3059 (956)  | 2749 (836)  | 2533 (741)  | 2486 (741)  | 2366 (693)  | 1936 (597)    | 2001 (574)  | 1936 (574)  | 1888 (550)  | 1769 (526)  |
| Vegetables (gm/day)       | 178 (123)   | 153 (100)   | 151 (105)   | 158 (109)   | 141(94)     | 138 (87)      | 154 (121)   | 164 (105)   | 154 (91)    | 157 (114)   |
| Fruits (gm/day)           | 131 (137)   | 133 (139)   | 153 (144)   | 179 (146)   | 215 (177)   | 146 (124)     | 178 (148)   | 178 (128)   | 205 (153)   | 233 (151)   |
| Fibre (gm/day)            | 29 (12)     | 26 (12)     | 25 (10)     | 26 (10)     | 27 (11)     | 21 (8)        | 24 (10)     | 22 (8)      | 22 (7)      | 22 (8)      |
| Salt (gm/day)             | 10 (4)      | 10 (4)      | 8.7 (3.25)  | 8.7 (3.25)  | 7.75 (3.25) | 6.25 (2.5)    | 6.5 (2.7)   | 6.5 (2.2)   | 6.25 (2.5)  | 5.75 (2.5)  |
| Fat (%E)                  | 33 (6)      | 34 (8)      | 35 (7)      | 34 (8)      | 34 (8)      | 33 (7)        | 33 (7)      | 35 (7)      | 35 (8)      | 35 (7)      |
| Saturated fat (%E)        | 13 (3)      | 13 (3)      | 13 (3)      | 13 (3)      | 13 (3)      | 13 (3)        | 13 (3)      | 14 (3)      | 13 (3)      | 14 (4)      |
| MUFA (%E)                 | 11 (3)      | 12 (3)      | 12 (3)      | 12 (3)      | 12 (3)      | 11 (3)        | 11 (3)      | 12 (3)      | 12 (3)      | 12 (3)      |
| PUFA (%E)                 | 5.9 (2.1)   | 6.1 (2.1)   | 6.6 (2.3)   | 6.3 (2.1)   | 6.2 (2.4)   | 5.8 (2.5)     | 5.9 (2.1)   | 6.3 (2.4)   | 6.4 (2.3)   | 6.4 (2.3)   |
| Cholesterol (mg/day)      | 441 (283)   | 404 (229)   | 362 (179)   | 413 (229)   | 382 (199)   | 254 (183)     | 270 (138)   | 315 (183)   | 328 (166)   | 318 (179)   |

\*Obtained from Norwegian national diet survey NORKOST3.

**Table 4.** Age-group and sex-specific mean (standard deviation) dietary intake of Finnish population incorporated in the PRIME model\* .

| Dietary components        | Men (n=795) |             |             |             |             | Women (n=913) |             |             |             |             |
|---------------------------|-------------|-------------|-------------|-------------|-------------|---------------|-------------|-------------|-------------|-------------|
| Age-group and sample size | 25-34 (106) | 35-44 (143) | 45-54 (162) | 55-64 (174) | 65-74 (210) | 25-34 (149)   | 35-44 (192) | 45-54 (178) | 55-64 (191) | 65-74 (203) |
| Energy (kcal/day)         | 2449 (830)  | 2275 (573)  | 2282 (674)  | 2053 (550)  | 1954 (632)  | 1861 (491)    | 1832 (556)  | 1677 (456)  | 1586 (430)  | 1484 (423)  |
| Vegetables (gm/day)       | 82 (88)     | 79 (79)     | 84 (98)     | 88 (118)    | 82 (103)    | 97 (83)       | 89 (75)     | 95 (92)     | 195 (91)    | 87 (73)     |
| Fruits (gm/day)           | 51 (92)     | 82 (139)    | 95 (141)    | 149 (180)   | 137 (160)   | 132 (181)     | 117 (132)   | 150 (163)   | 169 (197)   | 163 (164)   |
| Fibre (gm/day)            | 19 (8)      | 21 (11)     | 23 (10)     | 23 (10)     | 24 (11)     | 19 (9)        | 20 (9)      | 21 (7)      | 22 (9)      | 21 (9)      |
| Salt (gm/day)             | 9.5 (3)     | 8.8 (2.9)   | 9.3 (3.7)   | 8.3 (3)     | 7.9 (2.7)   | 6.7 (2.3)     | 6.8 (2.2)   | 6.4 (2.1)   | 6.3 (2.7)   | 5.7 (1.7)   |
| Fat (%E)                  | 36.7 (8)    | 35.6 (8.7)  | 35.9 (7.4)  | 36.4 (8.7)  | 34.6 (6.9)  | 36.5 (7.6)    | 36.1 (8)    | 34.8 (8.2)  | 34.8 (8.2)  | 33.5 (7.6)  |
| Saturated fat (%E)        | 14.4 (4.1)  | 13.7 (4.3)  | 13.9 (3.9)  | 14 (4.5)    | 13 (3.5)    | 14.3 (4.3)    | 14 (4.1)    | 13.6 (4.4)  | 13 (3.9)    | 12.7 (4.1)  |
| MUFA (%E)                 | 13.3 (3.3)  | 13 (3.8)    | 13 (3.6)    | 12.9 (3.9)  | 12.4 (3.3)  | 12.8 (3)      | 13.0 (3.7)  | 12.3 (3.5)  | 12.3 (3.9)  | 11.6 (3.4)  |
| PUFA (%E)                 | 6.2 (2.4)   | 6 (2.2)     | 6.2 (2.3)   | 6.4 (2.5)   | 6.2 (2.2)   | 6.3 (2.4)     | 6.3 (2.4)   | 6.1 (2.1)   | 6.4 (2.6)   | 6.2 (2.8)   |
| Cholesterol (mg/day)      | 336 (190)   | 293 (162)   | 302 (210)   | 270 (167)   | 242 (140)   | 227 (127)     | 223 (120)   | 210 (127)   | 185 (104)   | 184 (102)   |

\* Obtained from The National FINDIET 2012 survey (FINRISK).

**Table 5.** Age-group and sex-specific mean (standard deviation) dietary intake of Icelandic population incorporated in the PRIME model\* .

| Dietary components        | Men (n=632)  |             |             | Women (n=680) |             |             |
|---------------------------|--------------|-------------|-------------|---------------|-------------|-------------|
| Age-group and sample size | 18-30 (131)  | 31-60 (350) | 61-80 (151) | 18-30 (119)   | 31-60 (394) | 61-80 (167) |
| Energy (kcal/day)         | 2635 (883)   | 2402 (736)  | 2081 (678)  | 1895 (500)    | 1795 (536)  | 1610 (482)  |
| Vegetables (gm/day)       | 118 (94)     | 125 (90)    | 120 (137)   | 106 (103)     | 130 (101)   | 94 (75)     |
| Fruits (gm/day)           | 93 (121)     | 98 (117)    | 115 (119)   | 132 (137)     | 136 (118)   | 140 (112)   |
| Fibre (gm/day)            | 19.1 (9.5)   | 17.6 (7.3)  | 16.7 (7.5)  | 16.2 (6.7)    | 16.5 (6.1)  | 14.8 (5.7)  |
| Salt (gm/day)             | 10.14 (4.14) | 9.44 (3.48) | 8.8 (3.88)  | 6.69 (2.05)   | 6.57 (2.14) | 6.18 (2.62) |
| Fat (%E)                  | 33.6 (7)     | 36.6 (7.5)  | 39.4 (6.7)  | 32.8 (6.8)    | 36.1 (6.7)  | 37.4 (7.6)  |
| Saturated fat (%E)        | 13 (3.4)     | 14.5 (4.2)  | 16.2 (4.2)  | 12.7 (3.6)    | 14.4 (3.4)  | 15.3 (3.9)  |
| MUFA (%E)                 | 10.9 (2.4)   | 11.8 (2.5)  | 12.6 (2.3)  | 10.7 (2.6)    | 11.4 (2.5)  | 11.8 (2.8)  |

|                      |           |           |           |           |           |           |
|----------------------|-----------|-----------|-----------|-----------|-----------|-----------|
| PUFA (%E)            | 5.7 (2.3) | 6 (2.5)   | 5.9 (2.3) | 5.8 (2.7) | 6.1 (2.5) | 5.8 (2.3) |
| Cholesterol (mg/day) | 388 (230) | 390 (182) | 398 (198) | 224 (116) | 275 (138) | 287 (124) |

\* Obtained from The Diet of Icelanders—a national dietary survey 2010–2011.

## Annex 2 Country-specific estimated number of deaths averted or delayed by adhering to Nordic Nutrition Recommendations

**Table 1.** Estimated numbers of deaths averted or delayed by cause if Swedish men and women adhered to Nordic Nutrition Recommendations.

| Causes of death         | Men (mean, 95% CI)  | Women (mean, 95% CI) | Total (mean, 95% CI) |
|-------------------------|---------------------|----------------------|----------------------|
| Cardiovascular diseases |                     |                      |                      |
| Coronary heart disease  | 2532 (1913 to 2775) | 1623 (1266 to 2028)  | 4077 (4529 to 6462)  |
| Stroke                  | 551 (407 to 777)    | 609 (302 to 822)     | 1219 (729 to 1548)   |
| Heart failure           | 72 (37 to 139)      | 30 (9 to 36)         | 147 (46 to 175)      |
| Aortic aneurysm         | 27 (12 to 47)       | 4 (2 to 6)           | 49 (14 to 54)        |
| Pulmonary embolism      | 6 (2 to 11)         | 1 (0 to 3)           | 10 (2 to 14)         |
| Rheumatic Heart disease | 1 (0 to 3)          | 0 (0 to 1)           | 2 (1 to 4)           |
| Hypertensive disease    | 120 (59 to 200)     | 54 (18 to 65)        | 233 (77 to 267)      |
| Cancer                  |                     |                      |                      |
| Colo-rectal             | 76 (10 to 241)      | 90 (32 to 178)       | 261 (96 to 363)      |
| Lung                    | 240 (103 to 381)    | 142 (45 to 174)      | 407 (141 to 564)     |

**Table 2.** Estimated numbers of deaths averted or delayed by cause if Danish men and women adhered to Nordic Nutrition Recommendations.

| Causes of death         | Men (mean, 95% CI) | Women (mean, 95% CI) | Total (mean, 95% CI) |
|-------------------------|--------------------|----------------------|----------------------|
| Cardiovascular diseases |                    |                      |                      |
| Coronary heart disease  | 715 (535 to 879)   | 367 (245 to 483)     | 1075 (773 to 1346)   |
| Stroke                  | 349 (240 to 453)   | 260 (140 to 377)     | 610 (395 to 816)     |
| Heart failure           | 196 (82 to 313)    | 77 (33 to 126)       | 274 (119 to 438)     |
| Aortic aneurysm         | 14 (6 to 23)       | 5 (2 to 9)           | 19 (8 to 32)         |
| Pulmonary embolism      | 31 (10 to 63)      | 9 (3 to 18)          | 40 (13 to 79)        |
| Rheumatic Heart disease | 2 (1 to 4)         | 1 (0 to 2)           | 3 (1 to 6)           |
| Hypertensive disease    | 135 (59 to 204)    | 68 (29 to 108)       | 204 (89 to 311)      |
| Cancer                  |                    |                      |                      |

|             |                 |               |                 |
|-------------|-----------------|---------------|-----------------|
| Colo-rectal | 25 (2 to 49)    | 15 (4 to 26)  | 40 (15 to 66)   |
| Lung        | 123 (47 to 199) | 42 (15 to 72) | 164 (65 to 274) |

**Table 3.** Estimated numbers of deaths averted or delayed by cause if Finnish men and women adhered to Nordic Nutrition Recommendations.

| Causes of death         | Men (mean, 95% CI)  | Women (mean, 95% CI) | Total (mean, 95% CI) |
|-------------------------|---------------------|----------------------|----------------------|
| Cardiovascular diseases |                     |                      |                      |
| Coronary heart disease  | 2334 (1778 to 2843) | 1618 (1127 to 2071)  | 3968 (2868 to 4903)  |
| Stroke                  | 465 (338 to 587)    | 518 (316 to 700)     | 978 (654 to 1286)    |
| Heart failure           | 2 (1 to 3)          | 0 (-1 to 0)          | 1 (0 to 2)           |
| Aortic aneurysm         | 17 (7 to 28)        | -1 (-1 to 0)         | 16 (7 to 27)         |
| Pulmonary embolism      | 1 (0 to 2)          | 0 (-1 to 0)          | 1 (0 to 1)           |
| Rheumatic Heart disease | 0 (0 to 1)          | 0                    | 0                    |
| Hypertensive disease    | 103 (43 to 165)     | -19 (-10 to -22)     | 84 (34 to 144)       |
| Cancer                  |                     |                      |                      |
| Colo-rectal             | 56 (4 to 112)       | 45 (12 to 78)        | 102 (41 to 165)      |
| Lung                    | 160 (63 to 257)     | 71 (29 to 112)       | 230 (93 to 369)      |

**Table 4.** Estimated numbers of deaths averted or delayed by cause if Norwegian men and women adhered to Nordic Nutrition Recommendations.

| Causes of death         | Men (mean, 95% CI) | Women (mean, 95% CI) | Total (mean, 95% CI) |
|-------------------------|--------------------|----------------------|----------------------|
| Cardiovascular diseases |                    |                      |                      |
| Coronary heart disease  | 800 (603 to 982)   | 642 (446 to 824)     | 1446 (1063 to 1807)  |
| Stroke                  | 193 (126 to 258)   | 200 (82 to 317)      | 393 (221 to 565)     |
| Heart failure           | 74 (30 to 124)     | -8 (-5 to -9)        | 66 (26 to 116)       |
| Aortic aneurysm         | 0                  | 0                    | 0                    |
| Pulmonary embolism      | 0                  | 0                    | 0                    |
| Rheumatic Heart disease | 0                  | 0                    | 0                    |
| Hypertensive disease    | 136 (54 to 228)    | -2 (-5 to 16)        | 135 (50 to 244)      |
| Cancer                  |                    |                      |                      |
| Colo-rectal             | 39 (2 to 84)       | 52 (15 to 87)        | 92 (38 to 149)       |
| Lung                    | 70 (27 to 114)     | 33 (12 to 55)        | 102 (40 to 168)      |

**Table 5.** Estimated numbers of deaths averted or delayed by cause if Icelandic men and women adhered to Nordic Nutrition Recommendations.

| Causes of death | Men (mean, 95% CI) | Women (mean, 95% CI) | Total (mean, 95% CI) |
|-----------------|--------------------|----------------------|----------------------|
|-----------------|--------------------|----------------------|----------------------|

| Cardiovascular diseases |                |               |                  |
|-------------------------|----------------|---------------|------------------|
| Coronary heart disease  | 96 (77 to 113) | 51 (38 to 62) | 147 (116 to 174) |
| Stroke                  | 20 (14 to 25)  | 17 (10 to 24) | 37 (24 to 49)    |
| Heart failure           | 4 (2 to 7)     | 0             | 5 (2 to 8)       |
| Aortic aneurysm         | 1 (0 to 1)     | 0             | 1 (0 to 1)       |
| Pulmonary embolism      | 0 (0 to 1)     | 0             | 0 (0 to 1)       |
| Rheumatic Heart disease | 0              | 0             | 0                |
| Hypertensive disease    | 4 (2 to 6)     | 1 (0 to 2)    | 5 (2 to 8)       |
| Cancer                  |                |               |                  |
| Colo-rectal             | 6 (0 to 11)    | 4 (1 to 7)    | 10 (4 to 16)     |
| Lung                    | 9 (4 to 14)    | 8 (3 to 13)   | 18 (6 to 28)     |
